# Supplementary material
Source: publisher figshare collection journal article supplement (https://sage.figshare.com/ndownloader/files/17513303)
Supplement: Supplementary file 1 [file 17513303]

## Appendix A. Overview respondents

| Interview | Type      | Function                  | Function EMIF     | Topic      | Duration |        |
|-----------|-----------|---------------------------|-------------------|------------|----------|--------|
| 1 & 30    | EFPIA2    | Senior Director           | Co-lead WP & AD   | AD         | 55 min   | 30 min |
| 2 & 31    | EFPIA2    | IT Director Research      | Co-lead WP        | PLATFORM   | 48 min   | 49 min |
| 3 & 32    | EFPIA4    | Associate Director        | Co-lead WP        | METABOLIC  | 1h35     | 25 min |
| 4 & 33    | EFPIA3    | Director                  | Co-lead Metabolic | METABOLIC  | 1h20     | 40 min |
| 5 & 34    | EFPIA3    | Director                  | Co-lead WP        | PLATFORM   | 1h01     | 50 min |
| 6 & 35    | EFPIA5    | Director                  | Co-lead WP        | AD         | 1h08     | 45 min |
| 7 & 36    | EFPIA2    | Manager                   | Co-lead WP        | PLATFORM   | 55 min   | 1h00   |
| 8 & 37    | EFPIA2    | Senior Director           | Co-lead WP        | AD         | 1h30     | 30 min |
| 9 & 38    | EFPIA2    | IT Manager                | Co-lead WP        | PLATFORM   | 55min    | 50 min |
| 10 & 39   | Research6 | Professor                 | Co-lead Platform  | PLATFORM   | 56 min   | 15 min |
| 11 & 40   | Research4 | Clinician Scientist       | Co-coordinator    | MANAGEMENT | 34min    | 15 min |
| 12 & 41   | Research2 | Professor                 | Co-lead Metabolic | METABOLIC  | 40min    | 17 min |
| 13        | EFPIA2    | Global Head Neurosciences | N/A               | IMI        | 50min    |        |
| 14        | SME5      | Managing Consultant       | Member            | PLATFORM   | 1h50     |        |
| 15        | SME4      | Project Manager           | Project Manager   | AD         | 1h34     |        |
| 16        | SME6      | Professor                 | Member            | AD         | 30min    |        |
| 17        | SME2      | Director                  | Member            | PLATFORM   | 1h00     |        |
| 18        | Research5 | Professor                 | Co-lead WP        | AD         | 50min    |        |
| 19        | EFPIA1    | IT manager                | Co-lead WP        | PLATFORM   | 1h14     |        |
| 20        | EFPIA2    | Senior Vice President     | N/A               | IMI        | 1h03     |        |
| 21        | Research3 | Project Manager           | Member            | PLATFORM   | 32 min   |        |
| 22        | SME1      | CEO                       | Co-lead WP        | MANAGEMENT | 1h05     |        |
| 23        | EFPIA6    | Senior Director           | Member            | PLATFORM   | 1h25     |        |
| 24        | Research1 | Researcher                | Member            | PLATFORM   | 1h30     |        |
| 25        | EFPIA2    | Senior Director           | Co-lead Platform  | PLATFORM   | 1h06     |        |
| 26        | EFPIA2    | Senior Director           | Co-lead WP        | AD         | 1h20     |        |
| 27        | PO1       | Commercial Director       | Member            | MANAGEMENT | 1h05     |        |
| 28        | EFPIA     | Senior Director           | Co-lead WP        | PLATFORM   | 45 min   |        |
| 29        | Research7 | Professor                 | Member            | PLATFORM   | 43min    |        |

## **Appendix B. Interview guide**

### *About the respondents*

- Your role within your company
- Your role in the project
- How did you get involved in the project?
- What is your experience so far with the project?

### *About the collaboration between stakeholders*

- How do you feel about the mix of stakeholders? Could you describe what it is like to work with them? Probe into
  - o The benefits and challenges posed by the number and diversity of stakeholders.
  - o How informants perceive the complementary and interdependency between stakeholders.
- How is the collaboration managed? How do interactions take place? How are decisions made? Who does what? How is it determined? Probe into
  - o What actions are taken to stimulate the collaboration.
  - o How the collaboration could be improved.

### *About the co-leadership structure*

- What is the role of the co-leaders?
- How do you feel about the co-leadership structure?

### *Reflection questions*

- Is this the first time you collaborate in an IMI project? Is there a difference between the EMIF project and other (EU) projects you participated in?
- What are the lessons you learned from this project?

### *Follow-up interviews*

- How did the collaboration evolve? Probe into
  - o The influence of the number and diversity of stakeholders
  - o Collaboration on the different levels of EMIF: in your work package, between the different work packages, between the topics.
  - o The factors that gained importance to stimulate collaboration.
  - o The factors that can be improved.
  - o The challenges you still foresee.

## **Appendix C. Coding process**

To code our transcripts, we first labeled relevant words, phrases and/or passages as closely to the data as possible. During this phase, we did not use a coding scheme, but we let our codes emerge during the process. After this initial coding step, we grouped the empirically derived codes into higher-order conceptual constructs (Spiggle, 1994). On the one hand, we relied on constructs highlighted in the literature (e.g., formulating the project vision, stimulating bottom-up collaboration). On the other hand, we refined these constructs, created subcategories, and relabeled them (e.g., showcasing the project, developing project proposal). We repeated this coding process after the second round of interviews and refined and added constructs based on the new insights that emerged. This process resulted in a list of orchestration practices, supporting structures, and key challenges (Appendix C).

Next, we returned to our coding and specified relationships between the concepts. In this step, we paid specific attention to the processual nature of the network. To do so, we first created a timeline of events that had occurred since the initiation of the project, based on project documents such as meeting minutes, calendar entries, and PowerPoint presentations. The timeline captured events such as meetings, project deadlines, and outcomes in the form of publications. Based on the interview data, we then added the practices that orchestrators used over time. We also added the formal structures that supported orchestrators and the challenges that arose in the eyes of the informants.

This timeline formed the basis of the process model that we present in this paper. We observed that the orchestration practices could be grouped into three categories (connecting, facilitating and governing). We consider practices that orchestrators use to create and make the connections between stakeholders visible as ‘connecting’ practices. These practices ensure network members know who is who and who knows what. They help orchestrators create effective team compositions (e.g., when they motivate key contributors, bridge stakeholders or create smaller teams), ultimately to reduce network opacity. Practices that ensure harmony between stakeholders were coded as ‘facilitating’ practices. These practices create common cognitive representations of the project and developing relationships with high levels of cognitive and emotional trust. Facilitating practices work alongside connecting practices, by developing trustful relationships between stakeholders who are already connected, for example by discussing and raising awareness of differences between stakeholders. At the same time, they support relationship-building

between those stakeholders who are not (yet) connected, for example, when orchestrators formulate and showcase the project vision. Finally, we coded practices to create an effective network system as ‘governing’ practices. These practices ensure productive collaborative structures that support the timely delivery of agreed upon deliverables and milestones. Mapping connecting, facilitating and governing practices over time, allowed us to identify three corresponding innovation trajectories: the networks connections, network relations, and network systems trajectory.

In a final step, we contrasted the orchestration practices with the existing literature to categorize them as dominating or consensus-based, allowing us to observe how orchestrators switched between both modes. Throughout the analytical process, we continuously elaborated and refined our constructs, and relabeled them by contrasting them with prior research. All coding was conducted using the qualitative text analysis software NVivo (QSR International, 2012).

| Open code                                                                                                                                                                                                                                                        | Higher order constructs                      | Category               |
|------------------------------------------------------------------------------------------------------------------------------------------------------------------------------------------------------------------------------------------------------------------|----------------------------------------------|------------------------|
| <b>Leadership practices</b>                                                                                                                                                                                                                                      |                                              |                        |
| Assign participants to work packages, commit full time equivalents, source within organization, decide how to spread commitment                                                                                                                                  | Assigning roles                              | Connecting practices   |
| Get people together, make people aware of opportunities to collaborate, keep people informed                                                                                                                                                                     | Stimulating initial encounters               |                        |
| Get people interested, know their expertise, look for commitment, identify movers and shakers, match people’s interest with the work                                                                                                                             | Motivating key contributors                  |                        |
| Connect people who need to know each other, connect around mutual concerns, organize meetings so stakeholders can meet                                                                                                                                           | Bridging stakeholders                        |                        |
| Start small and then expand, create task forces, set up smaller focused projects                                                                                                                                                                                 | Creating smaller teams                       |                        |
| Develop a vision, explain how it aligns with IMI objectives                                                                                                                                                                                                      | Formulating project vision                   | Facilitating practices |
| Explain the project, understand the bigger picture, owner and face of vision, clarify the vision                                                                                                                                                                 | Showcasing project                           |                        |
| Workshops to discuss differences, no judging, set expectations, develop mutually agreed way working, determine language, identify complementarities, understand extremes, make people aware of differences, help see other perspectives, take people on the side | Discussing differences and raising awareness |                        |

|                                                                                                                                                         |                                     |                     |
|---------------------------------------------------------------------------------------------------------------------------------------------------------|-------------------------------------|---------------------|
| Get people on board, find support, enthusing people, empower the bottom-up, asking questions, being enthusiastic                                        | Stimulating bottom-up collaboration |                     |
| Creating good teams and relationships, people management, build trust, build relationships                                                              | Facilitating relationships          |                     |
| Define work packages, roles and responsibilities, assign deadlines, defining milestones and deliverables                                                | Developing project proposal         | Governing practices |
| Show results, emphasize joint efforts, create sense of belonging                                                                                        | Showcasing results                  |                     |
| Remind participants of deadlines, check if milestones are coming up, review progress, report results, reach consensus                                   | Monitoring progress                 |                     |
| Allow room for innovation, re-plan and re-allocate funding                                                                                              | Providing flexibility               |                     |
| <b>Key network challenges</b>                                                                                                                           |                                     |                     |
| Make sure the numbers add up                                                                                                                            | Mechanistic matching                |                     |
| Figure out where to contribute, get integrated, learn role, get involved, get to know people, get to know people's expertise, get out of your own world | Ambiguity                           |                     |
| Silo thinking, lack of a common mission, difficult to keep an overview, differences between academia and industry, different ways of working            | Fragmentation                       |                     |
| Slow, lack of mechanisms to steer, lack of accountability, mistrust, unclear who can make the final decision                                            | Inertia                             |                     |
